# Supplementary material for: Cell Type-Specific Anti-Adhesion Properties of Peritoneal Cell Treatment with Plasma-Activated Media (PAM)
Source: MDPI journal article supplement (doi:10.3390/biomedicines10040927), 2022-04-18
Supplement: s1 [file s1]

## Supplementary data

### Cell type-specific anti-adhesion properties of peritoneal cell treatment with plasma-activated media (PAM)

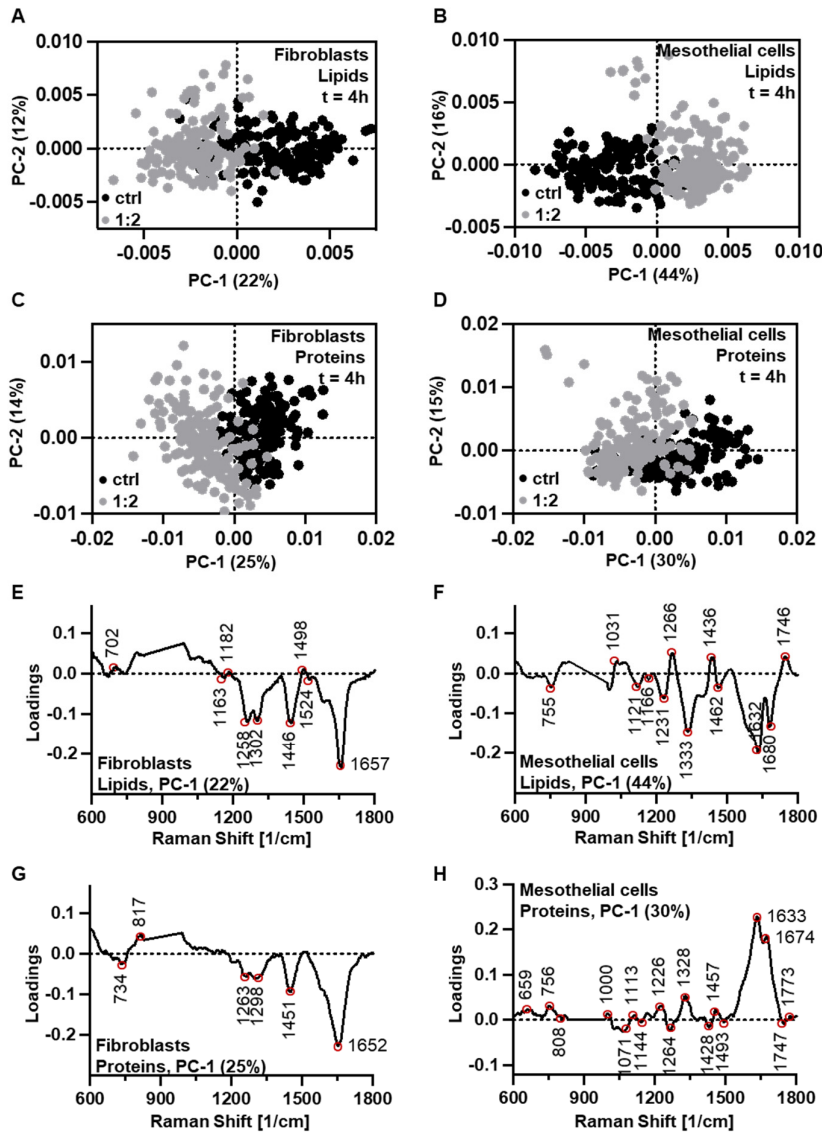

**Figure S1.** Characterization of cellular PAM effects by Raman imaging. (A–D) PCA based PC-1 vs. PC-2 score plot for the (A,B) lipid component and (C,D) the cytosolic protein component in fibroblasts and mesothelial cells. (E–H) Corresponding PC-1 loading plots for the (E,F) lipid component and (G,H) the cytosolic protein component in fibroblasts and mesothelial cells.

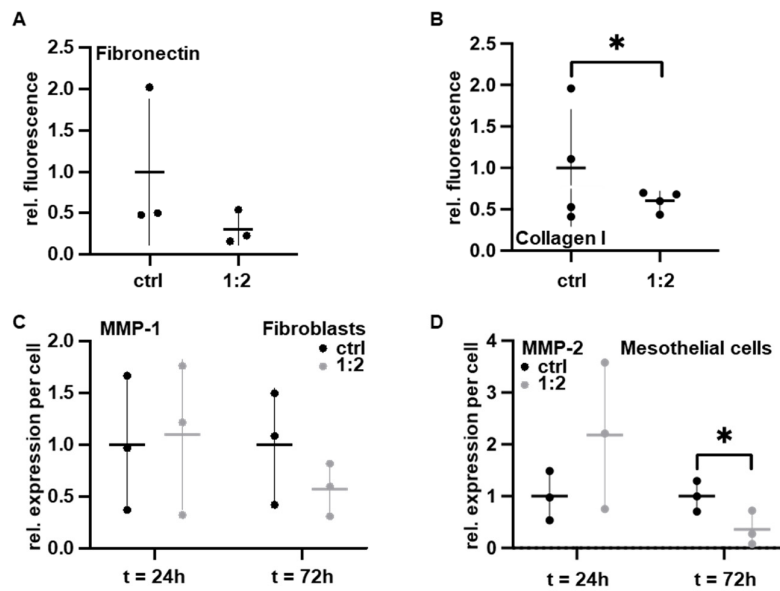

**Figure S2.** Fibronectin and MMP-1/2 expression analysis. Relative expression of fibronectin (**A**) and collagen I (**B**) per nucleus (mean intensity of (Fig. 4F,I) normalized to the control) of fibroblasts 120 h after 4 h of incubation with 1:2 diluted PAM (mean  $\pm$  SD; \* $p$  < 0.05; paired t test). (**C,D**) Relative MMP-2 expression 24 and 72 h after 4 h of incubation with 1:2 diluted PAM relative to control (mean  $\pm$  SD; \* $p$  < 0.05; paired t test).

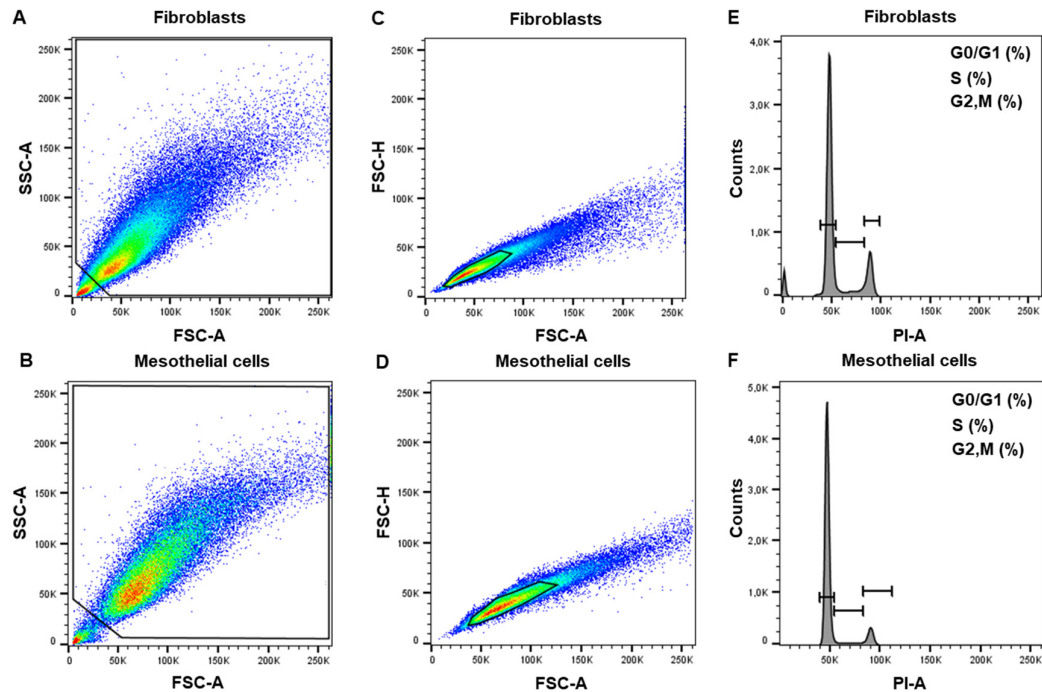

**Figure S3.** Gating strategy for flow cytometry. **(A–D)** Representative flow cytometry blots demonstrating the gating strategy for **(A,C)** fibroblasts and **(B,D)** mesothelial cells. Signals were measured and quantified using a FACSFortessa device (BD Bioscience) and FACS DIVA software v9 (BD Biosciences). Raw data were analyzed by FlowJo software v10 (FlowJo LLC). Forward- and side-scatter (FSC-H and SSC-H) characteristics were applied for dead cells and cell debris exclusion. Forward scatter area and height (FSC-A and FSC-H) characteristics were used to exclude cell doublets. **(E,F)** Representative DAPI histogram plot and setting of markers to quantitate the percentage of cells in each cell cycle phase.

**Table S1:** Identified Raman Peaks (cm<sup>-1</sup>) and their molecular assignment.

| Peaks (cm <sup>-1</sup> ) | Assignment                                                                                                                       | References |
|---------------------------|----------------------------------------------------------------------------------------------------------------------------------|------------|
| 659                       | g-conformation methionine                                                                                                        | [18]       |
| 690                       | Nucleotide conformation                                                                                                          | [19]       |
| 702                       | Cholesterol, cholesterol-Ester                                                                                                   | [20]       |
| 722                       | DNA                                                                                                                              | [21]       |
| 725                       | Adenine (DNA, RNA bases)                                                                                                         | [19]       |
| 734                       | trans-conformation methionine                                                                                                    | [18]       |
| 755                       | Tryptophane                                                                                                                      | [22,23,24] |
| 785                       | Uracil, thymine, cytosine (DNA, RNA bases);<br>O-P-O backbone                                                                    | [19]       |
| 808                       | Nucleic acid backbone                                                                                                            | [19]       |
| 915                       | Ribose                                                                                                                           | [19]       |
| 996                       | C-O ribose, C-C bond                                                                                                             | [25]       |
| 1000                      | Phenylalanine; NADH                                                                                                              | [26]       |
| 1063                      | C-C stretching mode                                                                                                              | [27]       |
| 1068                      | PO <sub>2</sub> <sup>-</sup> stretching DNA/RNA                                                                                  | [28]       |
| 1071                      | Glucose                                                                                                                          | [20]       |
| 1113                      | Amide III and different groups of proteins                                                                                       | [29]       |
| 1121                      | C-C lipids, fatty acids                                                                                                          | [18]       |
| 1163                      | Tyrosine (collagen type I)                                                                                                       | [19]       |
| 1182                      | Cytosine, guanine, adenine                                                                                                       | [22]       |
| 1226                      | Amide III                                                                                                                        | [28]       |
| 1231                      | Amide III                                                                                                                        | [25]       |
| 1249                      | Amide III                                                                                                                        | [25]       |
| 1258                      | Amide III                                                                                                                        | [22]       |
| 1263                      | Amide III, -CH in proteins                                                                                                       | [19,26,28] |
| 1266                      | Proteins                                                                                                                         | [19,24]    |
| 1300                      | -CH                                                                                                                              | [30]       |
| 1302                      | CH <sub>2</sub> twisting or wagging mode in phospholipids,<br>-CH <sub>3</sub> und -CH <sub>2</sub> wagging or bending in lipids | [19,24]    |
| 1328                      | -CH                                                                                                                              | [30]       |
| 1333                      | -CH                                                                                                                              | [30]       |
| 1428                      | C=OO in aspartate and glutamine,<br>-CH <sub>2</sub> in proteins                                                                 | [18,31]    |
| 1436                      | -CH <sub>2</sub> scissoring in lipids;<br>-CH in lipids and proteins                                                             | [27,28]    |
| 1443                      | Guanine, adenine (DNA, RNA bases);<br>-CH deformation (DNA, RNA)                                                                 | [28]       |
| 1446                      | -CH <sub>2</sub> bond and deformation in lipids                                                                                  | [22,23,32] |
| 1451                      | -CH <sub>2</sub> deformation                                                                                                     | [33]       |
| 1457                      | Deoxyribose                                                                                                                      | [34]       |
| 1462                      | CH <sub>2</sub> in lipids                                                                                                        | [18]       |
| 1493                      | Amid II (C-N bond; N-H bond)                                                                                                     | [25]       |
| 1498                      | Amide II                                                                                                                         | [25]       |
| 1520                      | Amide II (C-N)                                                                                                                   | [25]       |
| 1555                      | Amide                                                                                                                            | [35]       |
| 1632                      | Amide I band (C=O)                                                                                                               | [36]       |
| 1633                      | Amide I band proteins (C=O)                                                                                                      | [19,25,36] |

|      |                                        |            |
|------|----------------------------------------|------------|
| 1652 | Amide I (proteins)                     | [37]       |
| 1657 | Fatty acids, triacyl glyceride         | [19,25,38] |
| 1659 | Amide I                                | [39]       |
| 1674 | Amide I band (proteins)                | [37]       |
| 1746 | C=O lipids                             | [22]       |
| 1747 | -OH amino acids (aspartate, glutamine) | [18]       |
| 1749 | Amide I (C=O)                          | [40]       |
